# Supplementary material
Source: publisher site journal article supplement (https://www.degruyterbrill.com/publication/isbn/9783110223637/downloadAsset/9783110223637_Inhaltsverzeichnis%20Band%201.pdf)
Supplement: Supplementary file 1 [file 9783110223637_Inhaltsverzeichnis%20Band%201.pdf]

# Inhalt

## Band 1

|                                                |      |
|------------------------------------------------|------|
| Vorwort der Herausgeber .....                  | IX   |
| Hinweise für die Benutzung des Handbuchs ..... | XVII |
| Danksagung .....                               | XX   |

## Die frühen Gedichte (1959–1966)

|                  |   |
|------------------|---|
| Einleitung ..... | 3 |
|------------------|---|

### *Vorstellung meiner Hände*

|                                 |    |
|---------------------------------|----|
| Eingedenk der Märchenzeit ..... | 7  |
| Wenn ich komme .....            | 17 |

### *Ihr nennt es Sprache*

|                                                     |    |
|-----------------------------------------------------|----|
| Ihr nennt es Sprache oder Spiegel an der Wand ..... | 27 |
| Das Sein .....                                      | 31 |
| Von der Gegenständlichkeit eines Gedichtes .....    | 39 |

### *Le Chant du Monde*

|                                         |    |
|-----------------------------------------|----|
| Einfache Gedanken über meinen Tod ..... | 46 |
| Photographie .....                      | 53 |
| Schnee .....                            | 63 |
| Vechta i. O. ....                       | 68 |

### *Ohne Neger*

|                                    |    |
|------------------------------------|----|
| Henri, für einen Augenblick .....  | 74 |
| Vogel am leeren Winterhimmel ..... | 84 |

## Die Pop-Periode (1967–1969)

|                  |    |
|------------------|----|
| Einleitung ..... | 95 |
|------------------|----|

### *Was fraglich ist wofür*

|                                        |     |
|----------------------------------------|-----|
| Alka-Seltzer .....                     | 101 |
| Film .....                             | 106 |
| Von Walt Disney / für Carl-Heinz ..... | 114 |

*Godzilla* [Gedichtzyklus]

|                               |     |
|-------------------------------|-----|
| Godzilla.....                 | 120 |
| Celluloid 1967/68.....        | 129 |
| Das sexuelle Rotkäppchen..... | 136 |

*Die Piloten*

|                                                     |     |
|-----------------------------------------------------|-----|
| Brief an Humphrey Bogart, schon weit entfernt ..... | 142 |
| Gedicht auf einen Lieferwagen u. a.....             | 151 |
| Lebenslauf einer Frau.....                          | 155 |
| Lift. Populäres Gedicht Nr. 9.....                  | 160 |
| Der nackte Fuß von Ava Gardner.....                 | 164 |
| Noch einmal .....                                   | 172 |
| Ohne Chaplin .....                                  | 179 |
| Ohne Rente .....                                    | 187 |
| Populäres Gedicht Nr. 17.....                       | 198 |
| Ra-ta-ta-ta für Bonnie & Clyde etc.....             | 205 |
| Selbstbildnis im Supermarkt.....                    | 216 |
| Synthetisches Gedicht 7.2.68.....                   | 219 |
| Tarzan .....                                        | 229 |
| Eine übergroße Photographie von Liz Taylor.....     | 237 |
| Das Verschwinden eines Flugzeugs .....              | 246 |

*Standphotos*

|                                                   |     |
|---------------------------------------------------|-----|
| Beim Lesen von Ron Padgetts Great Balls of Fire / |     |
| Reading Ron Padgett's Great Balls of Fire.....    | 254 |
| Cinemascope .....                                 | 265 |
| Vanille.....                                      | 277 |

## Lyrischer Umbruch (1970–1972)

|                  |     |
|------------------|-----|
| Einleitung ..... | 291 |
|------------------|-----|

*Gras*

|                                              |     |
|----------------------------------------------|-----|
| Gedicht »Nacht« .....                        | 294 |
| Heute .....                                  | 307 |
| Oktober.....                                 | 312 |
| Schauspielerin .....                         | 318 |
| Unter Glas .....                             | 325 |
| Das weiße Bettlaken ist vor dem Fenster..... | 332 |
| Eine Geschichte.....                         | 341 |
| Meine blauen Wildlederschuhe.....            | 347 |
| Programmschluß .....                         | 356 |
| Vage Luft.....                               | 369 |

## Band 2

## Die späte Poetik (1973–1975)

|                  |     |
|------------------|-----|
| Einleitung ..... | 383 |
|------------------|-----|

*Westwärts 1 & 2*

|                                                                                                          |     |
|----------------------------------------------------------------------------------------------------------|-----|
| Ein Abend .....                                                                                          | 389 |
| Ballade.....                                                                                             | 397 |
| Canneloni in Olevano.....                                                                                | 403 |
| Chevaux de Trait .....                                                                                   | 410 |
| Chicago .....                                                                                            | 420 |
| La Dame Aux Camelias Potty Greta Garbo Vollmond.....                                                     | 431 |
| Dialog für den Russen Daniil Charms im Dezember.....                                                     | 437 |
| Diese Blöcke der Jahreszeiten.....                                                                       | 446 |
| Dieses Gedicht hat keinen Titel.....                                                                     | 451 |
| Einige sehr populäre Songs.....                                                                          | 461 |
| Ein Gedicht .....                                                                                        | 473 |
| Gedicht .....                                                                                            | 480 |
| Ein gewöhnliches Lied .....                                                                              | 496 |
| Guten Morgen in Köln .....                                                                               | 505 |
| Highkuh, West .....                                                                                      | 511 |
| Hymne auf einen italienischen Platz .....                                                                | 520 |
| Im Voyageurs Apt. 311 East 31st Street, Austin [Teil 3].....                                             | 528 |
| Improvisation 1, 2 & 3 (u. a. nach Han Shan).....                                                        | 534 |
| In London, Flat 6 .....                                                                                  | 541 |
| Einen jener klassischen.....                                                                             | 547 |
| Die Katze .....                                                                                          | 557 |
| Kleiner Nordwind .....                                                                                   | 566 |
| Eine Komposition, für M.....                                                                             | 578 |
| Landschaft .....                                                                                         | 591 |
| Lektüre, 2. März 1776 .....                                                                              | 598 |
| Lied am Samstagabend in Köln .....                                                                       | 605 |
| Lied von den kalten Bauern auf dem kalten Land,<br>Nordwestdeutschland, Krieg und Nachkriegszeiten ..... | 616 |
| Mondlicht in einem Baugerüst.....                                                                        | 626 |
| Na, irgendwie.....                                                                                       | 629 |
| Nach Shakespeare .....                                                                                   | 633 |
| Nacht .....                                                                                              | 641 |
| Noch einmal auf dem Land .....                                                                           | 652 |
| Oh, friedlicher Mittag.....                                                                              | 659 |
| Die Orangensaftmaschine .....                                                                            | 666 |
| Pawlows Hamburger .....                                                                                  | 672 |

|                                                             |     |
|-------------------------------------------------------------|-----|
| Plane, Too.....                                             | 680 |
| Politisches Gedicht 13. Nov. 74, BRD .....                  | 688 |
| Reisen in die nördlichen Gärten .....                       | 698 |
| Rolltreppen im August .....                                 | 707 |
| Roma die Notte .....                                        | 717 |
| Samstagabend im Winter.....                                 | 727 |
| Schattenmorellen .....                                      | 743 |
| Ein Skunk.....                                              | 751 |
| Sommer (Aus dem Amerikanischen) .....                       | 758 |
| Sonntagsgedicht .....                                       | 766 |
| Trauer auf dem Wäschendraht im Januar .....                 | 777 |
| Über das einzelne Weggehen .....                            | 785 |
| Ein unkontrolliertes Nachwort zu meinen Gedichten.....      | 787 |
| Variation ohne ein Thema.....                               | 810 |
| Vorbemerkung.....                                           | 817 |
| Westwärts .....                                             | 825 |
| Westwärts, Teil 2.....                                      | 836 |
| Die Fotofolgen aus <i>Westwärts 1 &amp; 2</i> .....         | 847 |
| Fragment zu einigen populären Songs.....                    | 861 |
| Ein friedliches Gedicht .....                               | 872 |
| Die Geschichten .....                                       | 882 |
| <i>Eiswasser an der Guadalupe Str.</i> [Gedichtzyklus]..... | 893 |
| Literaturverzeichnis .....                                  | 909 |
| Register                                                    |     |
| Namenregister .....                                         | 925 |
| Titelregister .....                                         | 935 |
| Die Autorinnen und Autoren .....                            | 941 |
